# Supplementary material
Source: publisher site journal article supplement (https://www.jstage.jst.go.jp/article/geochemj/49/3/49_2.0356/_supplement/_download/49_2.0356_1.pdf)
Supplement: Supplementary file 1 [file 49_2.0356_1.pdf]

## Supplementary Material

### *Measurements of BC using the Aethalometer AE31*

The aerosol BC mass concentration  $C_{BC}(wl)$  (in units of  $\text{g m}^{-3}$ ) is related to the attenuation coefficient ( $b_{ATN} = \frac{A}{V} \frac{dATN}{dt}$ ), attenuation cross-section ( $\sigma(wl) = \sigma_{\text{abs}} \cdot C_{\text{cor}}$ ), and  $R(ATN)$  by:

$$C_{BC}(wl) = \frac{b_{ATN}}{\sigma(wl) \cdot R(ATN)}, \quad (\text{S1})$$

where  $\sigma_{\text{abs}}$  is the mass specific absorption cross-section, and  $C_{\text{cor}}$  is the calibration factor. In this work, a value of  $\sigma(wl) = 16.6 \text{ m}^2 \text{ g}^{-1}$  at 880 nm was used, as supplied by the manufacturer.  $R(ATN)$  was calculated by:

$$R(ATN) = \left( \frac{1}{f} - 1 \right) \cdot \left( \frac{\log_e(ATN) - \log_e(10\%)}{\log_e(50\%) - \log_e(10\%)} \right) + 1 \quad (\text{S2})$$

In this work we used a value of  $f = 1.08$  by taking into account values at the maritime sites: Cabauw ( $51^\circ\text{N}$ ,  $4^\circ\text{E}$ ) and Mace Head ( $53^\circ\text{N}$ ,  $10^\circ\text{W}$ ) reported in Collaud Coen et al., (2010).

*Atmospheric CO measured at 1-min interval during high BC event*

As mentioned in the text, if BC, CO, and other gas concentrations are affected by the local sources on Rishiri Island, they would vary largely within a short time interval. During high BC events, atmospheric CO and CO<sub>2</sub> concentrations measured at 1-min intervals varied smoothly (Figure S1), suggestive of an air mass affected by remote sources.

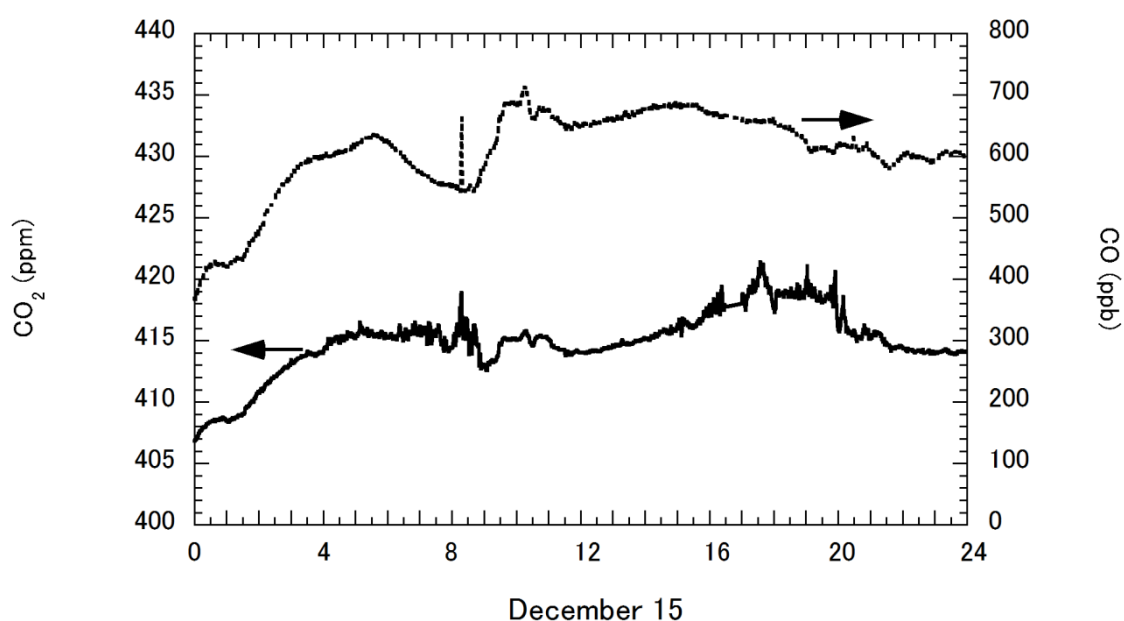

Figure S1. Atmospheric CO<sub>2</sub> and CO measured at 1-min intervals on December 15, 2012.

Supplementary Table S1. Air temperature (T), wind speed (WS), and wind direction (WD) observed at Kutsukata station on Rishiri Island during high BC events occurring between December 2012 and April 2013. The wind direction is reported using the 16 points of a compass.

| LT | T (°C)                   | WS (m s <sup>-1</sup> ) | WD               | T (°C)            | WS (m s <sup>-1</sup> ) | WD               | T (°C)             | WS (m s <sup>-1</sup> ) | WD               | T (°C)            | WS (m s <sup>-1</sup> ) | WD               | T (°C)            | WS (m s <sup>-1</sup> ) | WD               |
|----|--------------------------|-------------------------|------------------|-------------------|-------------------------|------------------|--------------------|-------------------------|------------------|-------------------|-------------------------|------------------|-------------------|-------------------------|------------------|
|    | December 14, 2012*       |                         |                  | December 31       |                         |                  | January 5          |                         |                  | January 12        |                         |                  | January 31        |                         |                  |
| 0  | 0.3                      | 4.4                     | SW               | 1.2*              | 3.9*                    | W*               | -8.6*              | 3.6*                    | W*               | -6.3*             | 3.0*                    | W*               | -0.8*             | 2.3*                    | N*               |
| 3  | 1.6                      | 4.8                     | SW               | 0*                | 6.1*                    | WNW*             | -7.1*              | 3.6*                    | WSW*             | -6.4*             | 4.9*                    | WNW*             | -1.1*             | 1.0*                    | E*               |
| 6  | 1.3                      | 3.2                     | WSW              | -0.5              | 5.5                     | WNW              | -6.5*              | 3.2*                    | WNW*             | -6.2*             | 3.6*                    | WNW*             | -0.9*             | 1.1*                    | ENE*             |
| 9  | 0.5                      | 6.4                     | WNW              | -1.9              | 5.5                     | NW               | -5.3*              | 3.4*                    | WSW*             | -5.2*             | 3.8*                    | SW*              | -0.8*             | 0.8*                    | NE*              |
| 12 | -1.1                     | 5.1                     | W                | -3.8              | 11.6                    | SW               | -2.5*              | 6.5*                    | SW*              | -4.7              | 3.5                     | WSW              | -0.2*             | 2.7*                    | SW*              |
| 15 | -0.1                     | 5.5                     | WNW              | -5.5              | 8.2                     | SW               | -1.9*              | 6.9*                    | SW*              | -3.7              | 3.4                     | W                | -0.2*             | 4.1*                    | SW*              |
| 18 | -0.2                     | 3.3                     | NW               | -5.5              | 6.7                     | W                | -0.8*              | 4.1*                    | WSW*             | -3.6              | 3.1                     | WNW              | 0.4*              | 4.8*                    | SSW*             |
| 21 | -1.4                     | 4.4                     | N                | -6.5              | 6.5                     | W                | -2.6               | 3.3                     | NW               | -4.6              | 3.6                     | NNE              | 0.9               | 6.0                     | SW               |
|    | December 15              |                         |                  | January 1, 2013   |                         |                  | January 6          |                         |                  | January 13        |                         |                  | February 1        |                         |                  |
| 0  | -2.0                     | 2.3                     | NE               | -7.4              | 6.5                     | W                | -4.6               | 3.4                     | NNW              | -5.2              | 5.2                     | NNE              | 1.7               | 6.3                     | SSW              |
| 3  | -1.7                     | 1.6                     | ENE              | -8.1              | 6.5                     | W                | -6.5               | 6.1                     | NNW              | -5.7              | 4.3                     | NNE              | 2.2               | 6.0                     | SSW              |
| 6  | -2.9                     | 1.6                     | E                | -7.4              | 6.6                     | W                | -6.6               | 7.0                     | WNW              | -5.8              | 5.2                     | NNW              | 2.7               | 6.3                     | SSW              |
| 9  | -1.5                     | 0.9                     | SE               | -6.7              | 5.3                     | W                | -7.8               | 7.5                     | WNW              | -6.3 <sup>#</sup> | 4.9 <sup>#</sup>        | NW <sup>#</sup>  | 3.2               | 6.0                     | SSW              |
| 12 | -0.2                     | 1.5                     | NE               | -6.1              | 5.1                     | W                | -9                 | 7.0                     | WNW              | -6.6 <sup>#</sup> | 4.1 <sup>#</sup>        | NW <sup>#</sup>  | 3.8               | 6.5                     | S                |
| 15 | -0.7                     | 0.7                     | E                | -5.7              | 5.2                     | WSW              | -9.2               | 6.3                     | NW               | -6.6 <sup>#</sup> | 3.0 <sup>#</sup>        | NW <sup>#</sup>  | 4.1               | 5.6                     | S                |
| 18 | -0.9                     | 2.0                     | ENE              | -6                | 4.8                     | WSW              | -9.1               | 5.6                     | WNW              | -7.1 <sup>#</sup> | 3.7 <sup>#</sup>        | WNW <sup>#</sup> | 4.4               | 7.4                     | S                |
| 21 | -0.8                     | 1.2                     | NE               | -5.4              | 5.2                     | WSW              | -8.9               | 6.7                     | NW               | -6.4 <sup>#</sup> | 4.3 <sup>#</sup>        | WNW <sup>#</sup> | 3.9               | 8.2                     | S                |
|    | December 16              |                         |                  | January 2         |                         |                  | January 7          |                         |                  |                   |                         |                  | February 2        |                         |                  |
| 0  | -0.9                     | 1.4                     | E                | -5.6              | 3.8                     | WSW              | -9.5               | 5.2                     | NW               |                   |                         |                  | 3.7               | 8.1                     | S                |
| 3  | 0.3                      | 3.3                     | NE               | -6                | 4.0                     | W                | -10.2 <sup>#</sup> | 5.2 <sup>#</sup>        | NW <sup>#</sup>  |                   |                         |                  | 2.9               | 5.8                     | S                |
| 6  | 0.8                      | 4.9                     | NE               | -5.9              | 4.1                     | WNW              | -9.9 <sup>#</sup>  | 4.1 <sup>#</sup>        | NW <sup>#</sup>  |                   |                         |                  | 2.7               | 4.5                     | S                |
| 9  | 0.1                      | 4.2                     | NE               | -6                | 1.9                     | W                | -9.6 <sup>#</sup>  | 4.9 <sup>#</sup>        | WNW <sup>#</sup> |                   |                         |                  | 4.2               | 8.6                     | SSW              |
| 12 | 0.2                      | 4.9                     | NNE              | -5.1              | 2.2                     | NNW              | -9.9 <sup>#</sup>  | 4.0 <sup>#</sup>        | NW <sup>#</sup>  |                   |                         |                  | -1.0              | 4.5                     | NW               |
| 15 | -0.7 <sup>#</sup>        | 6.7 <sup>#</sup>        | NNE <sup>#</sup> | -5.8              | 4.1                     | NNE              | -9.2 <sup>#</sup>  | 3.9 <sup>#</sup>        | WNW <sup>#</sup> |                   |                         |                  | -2.7              | 7.2                     | WNW              |
| 18 | -0.8 <sup>#</sup>        | 6.2 <sup>#</sup>        | NNE <sup>#</sup> | -5.5              | 3.6                     | NE               | -8.9 <sup>#</sup>  | 3.5 <sup>#</sup>        | WNW <sup>#</sup> |                   |                         |                  | -4.9              | 9.2                     | WNW              |
| 21 | -1.1 <sup>#</sup>        | 4.6 <sup>#</sup>        | NNE <sup>#</sup> | -5.9              | 6.9                     | NNE              | -8.4 <sup>#</sup>  | 2.7 <sup>#</sup>        | NW <sup>#</sup>  |                   |                         |                  | -5.9 <sup>#</sup> | 10.1 <sup>#</sup>       | WNW <sup>#</sup> |
|    | December 17 <sup>#</sup> |                         |                  | January 3         |                         |                  |                    |                         |                  |                   |                         |                  |                   |                         |                  |
| 0  | -0.9                     | 1.7                     | NE               | -5.7              | 6.5                     | NNE              |                    |                         |                  |                   |                         |                  |                   |                         |                  |
| 3  | -1.6                     | 1.1                     | ENE              | -6.4 <sup>#</sup> | 10.1 <sup>#</sup>       | NNE <sup>#</sup> |                    |                         |                  |                   |                         |                  |                   |                         |                  |
| 6  | 0.1                      | 2.2                     | WSW              | -7.2 <sup>#</sup> | 7.6 <sup>#</sup>        | NNE <sup>#</sup> |                    |                         |                  |                   |                         |                  |                   |                         |                  |
| 9  | -0.9                     | 5.7                     | NW               | -7.1 <sup>#</sup> | 6.4 <sup>#</sup>        | N <sup>#</sup>   |                    |                         |                  |                   |                         |                  |                   |                         |                  |
| 12 | -1.5                     | 4.4                     | W                | -7.2 <sup>#</sup> | 7.1 <sup>#</sup>        | N <sup>#</sup>   |                    |                         |                  |                   |                         |                  |                   |                         |                  |
| 15 | -2.4                     | 2.7                     | WSW              | -7.5 <sup>#</sup> | 5.8 <sup>#</sup>        | NNW <sup>#</sup> |                    |                         |                  |                   |                         |                  |                   |                         |                  |
| 18 | -2.6                     | 2.6                     | W                | -7.3 <sup>#</sup> | 3.8 <sup>#</sup>        | NW <sup>#</sup>  |                    |                         |                  |                   |                         |                  |                   |                         |                  |
| 21 | -2.4                     | 1.7                     | W                | -7.8 <sup>#</sup> | 4.1 <sup>#</sup>        | NW <sup>#</sup>  |                    |                         |                  |                   |                         |                  |                   |                         |                  |

\* Prior to high BC event

<sup>#</sup> After high BC event

Supplementary Table 1. Continued.

| LT | T (°C)            | WS (m s <sup>-1</sup> ) | WD             | T (°C)           | WS (m s <sup>-1</sup> ) | WD              | T (°C)            | WS (m s <sup>-1</sup> ) | WD               | T (°C)           | WS (m s <sup>-1</sup> ) | WD               |
|----|-------------------|-------------------------|----------------|------------------|-------------------------|-----------------|-------------------|-------------------------|------------------|------------------|-------------------------|------------------|
|    | February 15       |                         |                | March 5          |                         |                 | March 11          |                         |                  | April 22         |                         |                  |
| 0  | -4.2*             | 1.7*                    | E*             | -5.4*            | 0.6*                    | ESE*            | -6.9*             | 10.5*                   | NNE*             | 3.9*             | 3.0*                    | NNE*             |
| 3  | -5.2              | 3.3                     | NE             | -3.9*            | 1.0*                    | NNW*            | -5.8*             | 6.9*                    | N*               | 3.2              | 2.0                     | NNE              |
| 6  | -5.5              | 4.6                     | NNE            | -6.0*            | 0.7*                    | ESE*            | -6.0*             | 7.1*                    | NNW*             | 3.5              | 2.6                     | NNE              |
| 9  | -5.5              | 4.9                     | N              | -2.5*            | 2.2*                    | SSW*            | -6.3*             | 5.5*                    | NNW*             | 5.8              | 3.8                     | WNW              |
| 12 | -4.6              | 4.0                     | N              | -0.3             | 4.4                     | SSW             | -4.2*             | 4.7*                    | W*               | 6.2              | 2.9                     | WNW              |
| 15 | -5.5              | 4.1                     | NNE            | 0.2              | 4.2                     | SW              | -3.4*             | 7.7*                    | SW*              | 6.2              | 2.1                     | WNW              |
| 18 | -5.1              | 3.1                     | NNW            | 0.0              | 5.8                     | SW              | -3.5*             | 4.7*                    | SW*              | 6                | 2.3                     | S                |
| 21 | -7.5              | 1.7                     | NE             | 0.9              | 7.2                     | SW              | -1.4              | 5.1                     | WSW              | 6.3              | 1.6                     | SE               |
|    | February 16       |                         |                | March 6          |                         |                 | March 12          |                         |                  | April 23         |                         |                  |
| 0  | -6.8              | 5.9                     | NNE            | 1.7              | 7.1                     | SW              | 0.2               | 7.3                     | W                | 6.7              | 2.3                     | S                |
| 3  | -7.6              | 5.4                     | NNE            | 0.4              | 4.5                     | SW              | 0.6               | 6.8                     | WSW              | 4.4              | 0.9                     | SSE              |
| 6  | -7.5              | 6.1                     | NNE            | -0.8             | 3.1                     | N               | 1.5               | 8.1                     | SW               | 4.6              | 1.1                     | ESE              |
| 9  | -6.9              | 6.5                     | N              | -1.0             | 4.3                     | N               | 1.8               | 4.5                     | WSW              | 7.4              | 1.4                     | WNW              |
| 12 | -6.6              | 5.9                     | N              | -0.9             | 4.8                     | NNW             | 2.4               | 4.6                     | SW               | 8.8              | 3.8                     | SSW              |
| 15 | -6.4              | 7.4                     | N              | 0.7              | 1.7                     | NNW             | 2.5               | 5.0                     | SW               | 10.5             | 4.4                     | S                |
| 18 | -6.7              | 9.2                     | N              | 0.7              | 2.8                     | SW              | 2.9               | 4.6                     | SSW              | 8                | 3.0                     | S                |
| 21 | -6.9 <sup>#</sup> | 8.2 <sup>#</sup>        | N <sup>#</sup> | 2.5              | 4.6                     | SW              | 3.2               | 5.0                     | S                | 6.7              | 3.4                     | S                |
|    |                   |                         |                | March 7          |                         |                 | March 13          |                         |                  | April 24         |                         |                  |
| 0  |                   |                         |                | 0.5              | 1.6                     | S               | 3.6               | 4                       | S                | 7.3              | 3.5                     | S                |
| 3  |                   |                         |                | 2.5              | 5.2                     | S               | 3.1               | 6.4                     | SW               | 7.3              | 3.2                     | SSE              |
| 6  |                   |                         |                | 2.8              | 7.0                     | SSW             | 2.4               | 3.1                     | SW               | 8.7              | 4.6                     | S                |
| 9  |                   |                         |                | 2.7              | 10.9                    | S               | 1.8               | 1.7                     | NW               | 8                | 2.7                     | SSE              |
| 12 |                   |                         |                | 2.1              | 11.8                    | S               | -0.1              | 3.2                     | N                | 10.2             | 5.7                     | S                |
| 15 |                   |                         |                | 2.3              | 12.8                    | S               | 0                 | 4.1                     | NNW              | 11.9             | 3.9                     | S                |
| 18 |                   |                         |                | 3.7 <sup>#</sup> | 8.7 <sup>#</sup>        | SW <sup>#</sup> | -0.9              | 3.4                     | NNW              | 9.8              | 1.8                     | S                |
| 21 |                   |                         |                | 2.8 <sup>#</sup> | 5.1 <sup>#</sup>        | W <sup>#</sup>  | -0.9              | 5                       | NNW              | 9.4              | 2.8                     | NE               |
|    |                   |                         |                |                  |                         |                 | March 14          |                         |                  | April 25         |                         |                  |
| 0  |                   |                         |                |                  |                         |                 | -2.5              | 3.9                     | NNW              | 6.8              | 2.3                     | ENE              |
| 3  |                   |                         |                |                  |                         |                 | -3.1 <sup>#</sup> | 4.0 <sup>#</sup>        | NW <sup>#</sup>  | 5.9 <sup>#</sup> | 0.6 <sup>#</sup>        | ENE <sup>#</sup> |
| 6  |                   |                         |                |                  |                         |                 | -4.6 <sup>#</sup> | 6.6 <sup>#</sup>        | WNW <sup>#</sup> | 6.3 <sup>#</sup> | 4.2 <sup>#</sup>        | SSW <sup>#</sup> |
| 9  |                   |                         |                |                  |                         |                 | -5.2 <sup>#</sup> | 7.2 <sup>#</sup>        | WNW <sup>#</sup> | 6.6 <sup>#</sup> | 3.0 <sup>#</sup>        | SSW <sup>#</sup> |
| 12 |                   |                         |                |                  |                         |                 | -4.9 <sup>#</sup> | 5.1 <sup>#</sup>        | WNW <sup>#</sup> | 5.5 <sup>#</sup> | 2.9 <sup>#</sup>        | W <sup>#</sup>   |
| 15 |                   |                         |                |                  |                         |                 | -5.1 <sup>#</sup> | 4.5 <sup>#</sup>        | WSW <sup>#</sup> | 4.0 <sup>#</sup> | 8.8 <sup>#</sup>        | WNW <sup>#</sup> |
| 18 |                   |                         |                |                  |                         |                 | -3.6 <sup>#</sup> | 3.7 <sup>#</sup>        | WSW <sup>#</sup> | 3.7              | 5.2 <sup>#</sup>        | NW <sup>#</sup>  |
| 21 |                   |                         |                |                  |                         |                 | -1.9 <sup>#</sup> | 6.2 <sup>#</sup>        | SW <sup>#</sup>  | 4.0 <sup>#</sup> | 4.1 <sup>#</sup>        | N <sup>#</sup>   |

\* Prior to high BC event

<sup>#</sup> After high BC event
